# Supplementary material for: Postoperative Seizure in Patients with Malignant Glioma Undergoing Tumor Resection with Intraoperative Mapping: Risk Factors, Management Strategies, and the Utility of Bayesian Analysis in a Case-Control Cohort
Source: Research Square preprint supplement (doi:10.21203/rs.3.rs-8705953/v1), 2026-02-10

**Supplementary Methods:**

*Statistical Analysis*

During preliminary analysis, an unusual association was noted between seizures and postoperative AED regimen (Table 1). It was also noted that 50% of patients with seizures had early postoperative seizures (within 7 days) and that this association was solely attributed to patients with early seizures (Supplemental Digital Content 2, Table 1). Since it is most likely that adjustments to AED regimen at discharge were made because of patients experiencing early postoperative seizures, accounting for the significant difference observed, a decision was made not to include this variable in the primary outcome multivariable analysis to avoid misinterpretation and to avoid violation to multicollinearity assumption. We instead opted to perform a post hoc analysis with early (within 7 days) and late (7 days to 6 months) postoperative seizures as secondary outcomes to account for this confounder.

REFERENCES.

1 Eseonu, C. I. *et al.* Awake Craniotomy Anesthesia: A Comparison of the Monitored Anesthesia Care and Asleep-Awake-Asleep Techniques. *World Neurosurgery* **104**, 679-686, doi:10.1016/j.wneu.2017.05.053 (2017).

2 van de Schoot, R. *et al.* Bayesian statistics and modelling. *Nat Rev Methods Primers* **1**, 1-26, doi:10.1038/s43586-020-00001-2 (2021).

3 Kruschke, J. K. in *Doing Bayesian Data Analysis* (2015).

4 Gelman, A. & Rubin, D. B. Inference from Iterative Simulation Using Multiple Sequences. *Statistical Science* **7**, 457-472, doi:10.1214/ss/1177011136 (1992).

5 Brooks, S. P. & Gelman, A. General Methods for Monitoring Convergence of Iterative Simulations. *Journal of Computational and Graphical Statistics* **7**, 434-455, doi:10.1080/10618600.1998.10474787 (1998).

**Table S1. Fisher’s exact test showing association between early seizures and postoperative AED regimen at discharge.**

P<0.000, suggesting that AED adjustments were most likely made due to early seizures. Therefore a multivariable model including AED regimen at discharge would lead to the misleading conclusion that AEDs are a significant risk factor for seizures.

| **AED Discharge Adjustment** | **Immediate Postoperative Seizures** | | |
| --- | --- | --- | --- |
|  | **No** | **Yes** | **Total** |
| No Change to Preoperative Course | 21 | 1 | 22 |
|  | 31.34 | 6.67 | 26.83 |
| Monotherapy with Dose | 30 | 1 | 31 |
|  | 44.78 | 6.67 | 37.8 |
| Complex Adjustment (>= 2) | 16 | 13 | 29 |
|  | 23.88 | 86.67 | 35.37 |
| Total | 67 | 15 | 82 |
|  | 100.00 | 100.00 | 100.00 |
| **Fisher's Exact = 0.000** | | | |

**Table S2. Multivariable analysis of early and late postoperative seizures with multiple imputation.**

| **Primary Outcome: Early or Late Seizure** | **Odds Ratio** | **95% Confidence Interval** | **P-value** |
| --- | --- | --- | --- |
| Age |  |  |  |
| 45-54 | 2.249807 | 0.4809011-10.52531 | 0.303 |
| 55-64 | 2.9566 | 0.5121818-17.06715 | 0.226 |
| 65-74 | 2.995395 | 0.49066831-18.28551 | 0.235 |
| 75 and Older | 4.262321 | 0.3909362-46.47147 | 0.234 |
|  |  |  |  |
| Income |  |  |  |
| Below US Median Household Income | 0.6617115 | 0.1972109-2.220273 | 0.504 |
|  |  |  |  |
| Glioma Type |  |  |  |
| High Grade Glioma | 1.036845 | 0.1663389-0.462997 | 0.969 |
|  |  |  |  |
| Speech Mapping |  |  |  |
| Yes | 1.396424 | 0.2179611-8.946555 | 0.725 |
|  |  |  |  |
| Motor Mapping |  |  |  |
| Yes | 0.3764431 | 0.0767521-1.846327 | 0.229 |
|  |  |  |  |
| SSEP Mapping |  |  |  |
| Yes | 3.259508 | 0.6090258-17.4449 | 0.167 |
|  |  |  |  |
| Anesthesia Type |  |  |  |
| Awake | 0.4159804 | 0.0795044-2.176479 | 0.299 |
|  |  |  |  |
| Seizure History Preoperatively |  |  |  |
| Yes | 1.476457 | 0.3359465-6.488908 | 0.606 |
|  |  |  |  |
| Seizures Intraoperatively |  |  |  |
| Yes | 2.446307 | 0.359656-16.63928 | 0.36 |
|  |  |  |  |
| Extent of Resection |  |  |  |
| Gross Total Resection (GTR) | 1.360382 | 0.3742214-4.945306 | 0.64 |
|  |  |  |  |
| AED Preoperative Regimen |  |  |  |
| One AED | 3.419094 | 0.4841275-24.14695 | 0.218 |
| More than One AED | 28.45087 | 2.154688-375.6702 | 0.011 |

**Table S3. Multivariable analysis of early postoperative seizures.**

| **Delayed Seizure (6 Months)** | **Odds Ratio** | **95% Confidence Interval** | **P-value** |
| --- | --- | --- | --- |
| Age |  |  |  |
| 45-54 | 0.780901 | 0.525684-11.60052 | 0.857 |
| 55-64 | 9.275596 | 0.7039888-122.2131 | 0.09 |
| 65-74 | 5.037906 | 0.434642-58.39403 | 0.196 |
| 75 and Older | 10.17435 | 0.2916871-354.8922 | 0.201 |
|  |  |  |  |
| Income |  |  |  |
| Below US Median Household Income | 1.805703 | 0.2903965-11.22797 | 0.526 |
|  |  |  |  |
| Glioma Type |  |  |  |
| High Grade Glioma | 1.3306009 | 0.0738129-23.10786 | 0.855 |
|  |  |  |  |
| Speech Mapping |  |  |  |
| Yes | 0.261096 | 0.0107728-6.328059 | 0.409 |
|  |  |  |  |
| Motor Mapping |  |  |  |
| Yes | 0.0810378 | 0.0076658-0.8566744 | 0.037 |
|  |  |  |  |
| SSEP Mapping |  |  |  |
| Yes | 4.09719 | 0.2583722-64.97206 | 0.317 |
|  |  |  |  |
| Anesthesia Type |  |  |  |
| Awake | 0.8400254 | 0.0652758-10.81017 | 0.894 |
|  |  |  |  |
| Seizure History Preoperatively |  |  |  |
| Yes | 5.567993 | 0.3324663-93.25019 | 0.232 |
|  |  |  |  |
| Seizures Intraoperatively |  |  |  |
| Yes | 1.366456 | 0.0905303-20.62517 | 0.822 |
|  |  |  |  |
| Extent of Resection |  |  |  |
| Gross Total Resection (GTR) | 1.046286 | 0.1429882-7.655974 | 0.964 |
|  |  |  |  |
| AED Preoperative Regimen |  |  |  |
| One AED | 0.6599849 | 0.0317657-13.71228 | 0.788 |
| More than One AED | 31.5819 | 0.5014198-1989.184 | 0.102 |
|  |  |  |  |
| AED Discharge Adjustment |  |  |  |
| Monotherapy with Dose Increase | 2.465268 | 0.2392088-25.40687 | 0.448 |
| Complex Adjustment (>= 2 AEDs) | 0.6235748 | 0.0727162-5.34744 | 0.667 |

**Table S4. Multivariable analysis of late postoperative seizures with multiple imputation.**

| **Delayed Seizure (6 Months)** | **Odds Ratio** | **95% Confidence Interval** | **P-value** |
| --- | --- | --- | --- |
| Age |  |  |  |
| 45-54 | 0.6363392 | 0.0455393-8.891821 | 0.737 |
| 55-64 | 4.14651 | 0.3471001-49.53482 | 0.26 |
| 65-74 | 2.381416 | 0.2137448-26.5323 | 0.48 |
| 75 and Older | 4.279693 | 0.1242603-147.3984 | 0.418 |
|  |  |  |  |
| Income |  |  |  |
| Below US Median Household Income | 1.685954 | 0.2905109-9.784288 | 0.56 |
|  |  |  |  |
| Glioma Type |  |  |  |
| High Grade Glioma | 2.575814 | 0.1447376-45.84033 | 0.519 |
|  |  |  |  |
| Speech Mapping |  |  |  |
| Yes | 0.2188957 | 0.0116457-4.114436 | 0.309 |
|  |  |  |  |
| Motor Mapping |  |  |  |
| Yes | 0.0880531 | 0.0083156-.9323834 | 0.044 |
|  |  |  |  |
| SSEP Mapping |  |  |  |
| Yes | 2.421451 | 0.1992331-29.42998 | 0.487 |
|  |  |  |  |
| Anesthesia Type |  |  |  |
| Awake | 0.4571646 | 0.0442859-4.719326 | 0.511 |
|  |  |  |  |
| Seizure History Preoperatively |  |  |  |
| Yes | 4.430497 | 0.2988845-65.67521 | 0.279 |
|  |  |  |  |
| Seizures Intraoperatively |  |  |  |
| Yes | 1.793502 | 0.107495-29.92371 | 0.682 |
|  |  |  |  |
| Extent of Resection |  |  |  |
| Gross Total Resection (GTR) | 0.8164441 | 0.1104599-6.034595 | 0.842 |
|  |  |  |  |
| AED Preoperative Regimen |  |  |  |
| One AED | 0.4758277 | 0.025932-8.731004 | 0.617 |
| More than One AED | 12.42374 | 0.2264734-681.5337 | 0.217 |
|  |  |  |  |
| AED Discharge Adjustment |  |  |  |
| Monotherapy with Dose Increase | 3.04157 | 0.3156991-29.30369 | 0.336 |
| Complex Adjustment (>= 2 AEDs) | 0.7520421 | 0.0823631-6.866756 | 0.8 |

**Table S5. Results of Gelman-Rubin (Rc-hat value) convergence diagnostics for each parameter assessed in the Bayesian logistic regression model.**

All parameters achieve Rc-hat <1.1 and all except for two achieve Rc-hat<1.01.

| **Any Seizure Postoperation** | **Rc** |
| --- | --- |
| Age |  |
| 45-54 | 1.00098 |
| 55-64 | 1.000419 |
| 65-74 | 1.007727 |
| 75 and Older | 1.03572 |
|  |  |
| Income |  |
| Below US Median Household Income | 1.000123 |
|  |  |
| Glioma Type |  |
| High Grade Glioma | 1.002502 |
|  |  |
| Speech Mapping |  |
| Yes | 1.001082 |
|  |  |
| Motor Mapping |  |
| Yes | 1.000689 |
|  |  |
| SSEP Mapping |  |
| Yes | 1.001208 |
|  |  |
| Anesthesia Type |  |
| Awake | 1.000142 |
|  |  |
| Seizure History Preoperatively |  |
| Yes | 1.000154 |
|  |  |
| Seizures Intraoperatively |  |
| Yes | 1.002491 |
|  |  |
| Extent of Resection |  |
| Gross Total Resection (GTR) | 1.000169 |
|  |  |
| AED Preoperative Regimen |  |
| One AED | 1.010732 |
| More than One AED | 1.008559 |

**Table S6. Effective samples sizes and efficiency values for each parameter.**

| **Any Seizure Postoperation** | **ESS** | **Corr. Time** | **Efficiency** |
| --- | --- | --- | --- |
| Age |  |  |  |
| 45-54 | 31280.22 | 5.12 | 19.55% |
| 55-64 | 34010.17 | 4.7 | 21.26% |
| 65-74 | 29758.27 | 5.38 | 18.60% |
| 75 and Older | 32272.53 | 4.96 | 20.17% |
|  |  |  |  |
| Income |  |  |  |
| Below US Median Household Income | 34929 | 4.58 | 21.83% |
|  |  |  |  |
| Glioma Type |  |  |  |
| High Grade Glioma | 30425.75 | 5.26 | 19.02% |
|  |  |  |  |
| Speech Mapping |  |  |  |
| Yes | 36809.12 | 4.35 | 23.01% |
|  |  |  |  |
| Motor Mapping |  |  |  |
| Yes | 28747.47 | 5.57 | 17.97% |
|  |  |  |  |
| SSEP Mapping |  |  |  |
| Yes | 39489.19 | 4.02 | 24.91% |
|  |  |  |  |
| Anesthesia Type |  |  |  |
| Awake | 31756.88 | 5.04 | 19.85% |
|  |  |  |  |
| Seizure History Preoperatively |  |  |  |
| Yes | 31880.75 | 5.02 | 19.93% |
|  |  |  |  |
| Seizures Intraoperatively |  |  |  |
| Yes | 30025 | 5.33 | 18.77% |
|  |  |  |  |
| Extent of Resection |  |  |  |
| Gross Total Resection (GTR) | 26385.76 | 6.06 | 16.49% |
|  |  |  |  |
| AED Preoperative Regimen |  |  |  |
| One AED | 35354.04 | 4.53 | 22.10% |
| More than One AED | 29030.82 | 5.51 | 18.14% |

**Table S7. Results of Bayesian logistic regression analysis using data-derived prior on history of seizures.**

| **Age** | **Odds Ratio** | **Std. Dev.** | **MSCE** | **HPD (95% Credible Interval)** |
| --- | --- | --- | --- | --- |
| 45-54 | 4.111691 | 4.833051 | 0.24571 | 0.1273216-12.05585 |
| 55-64 | 6.597792 | 9.624157 | 0.045365 | 0.1112953-21.00375 |
| 65-74 | 6.704584 | 10.28134 | 0.466654 | 0.1115284-21.42016 |
| 75 and Older | 17.2578 | 48.46478 | 0.225268 | 0.0210846-63.48179 |
|  |  |  |  |  |
| Income |  |  |  |  |
| Below US Median Household Income | 0.7730625 | 0.600104 | 0.00313 | 0.0685073-1.888104 |
|  |  |  |  |  |
| Glioma Type |  |  |  |  |
| High Grade Glioma | 1.9963331 | 3.332992 | 0.015172 | 0.0215495-6.333954 |
|  |  |  |  |  |
| Speech Mapping |  |  |  |  |
| Yes | 2.829299 | 4.81705 | 0.024401 | 0.0279681-9.249704 |
|  |  |  |  |  |
| Motor Mapping |  |  |  |  |
| Yes | 0.4310555 | 0.4847919 | 0.002438 | 0.0109875-1.249663 |
|  |  |  |  |  |
| SSEP Mapping |  |  |  |  |
| Yes | 7.11946 | 11.03436 | 0.056105 | 0.1587122-22.07964 |
|  |  |  |  |  |
| Anesthesia Type |  |  |  |  |
| Awake | 0.5149751 | 0.6519952 | 0.003348 | 0.0095869-1.561326 |
|  |  |  |  |  |
|  |  |  |  |  |
| Seizure History Preoperatively |  |  |  |  |
| Yes | 2.240072 | 1.653376 | 0.008816 | 0.2824738-5.355542 |
|  |  |  |  |  |
| Seizures Intraoperatively |  |  |  |  |
| Yes | 5.965645 | 10.44043 | 0.050063 | 0.041815-19.85764 |
|  |  |  |  |  |
| Extent of Resection |  |  |  |  |
| Gross Total Resection (GTR) | 2.002036 | 1.784618 | 0.009206 | 0.1365298-5.154861 |
|  |  |  |  |  |
| AED Preoperative Regimen |  |  |  |  |
| One AED | 8.84222 | 16.93655 | 0.088693 | 0100071-29.41194 |
| More than One AED | 211.8676 | 707.4854 | 3.33188 | 0.2417435-7772.1989 |

**Table S8. Results of Gelman-Rubin (Rc-hat value) convergence diagnostics for each parameter assessed in the Bayesian logistic regression model with data-derived priors.**

All parameters achieve Rc-hat <1.1 and all except for model constant achieved Rc-hat<1.01.

| **Any Seizure Postoperation** | **Rc** |
| --- | --- |
| Age |  |
| 45-54 | 1.002312 |
| 55-64 | 1.000325 |
| 65-74 | 1.000876 |
| 75 and Older | 1.001124 |
|  |  |
| Income |  |
| Below US Median Household Income | 1.00036 |
|  |  |
| Glioma Type |  |
| High Grade Glioma | 1.004733 |
|  |  |
| Speech Mapping |  |
| Yes | 1.001769 |
|  |  |
| Motor Mapping |  |
| Yes | 1.000403 |
|  |  |
| SSEP Mapping |  |
| Yes | 1.000119 |
|  |  |
| Anesthesia Type |  |
| Awake | 1.001435 |
|  |  |
| Seizure History Preoperatively |  |
| Yes | 1.000108 |
|  |  |
| Seizures Intraoperatively |  |
| Yes | 1.000635 |
|  |  |
| Extent of Resection |  |
| Gross Total Resection (GTR) | 1.000137 |
|  |  |
| AED Preoperative Regimen |  |
| One AED | 1.001365 |
| More than One AED | 1.0006 |

**Table S9. Effective samples sizes and efficiency values for each parameter in the model with data-derived priors.**

| **Any Seizure Postoperation** | **ESS** | **Corr. Time** | **Efficiency** |
| --- | --- | --- | --- |
| Age |  |  |  |
| 45-54 | 35191.38 | 4.55 | 21.99% |
| 55-64 | 34727.37 | 4.61 | 21.70% |
| 65-74 | 36295.08 | 4.41 | 22.68% |
| 75 and Older | 27745.44 | 5.77 | 17.34% |
|  |  |  |  |
| Income |  |  |  |
| Below US Median Household Income | 31976.42 | 5 | 19.99% |
|  |  |  |  |
| Glioma Type |  |  |  |
| High Grade Glioma | 32660.48 | 4.9 | 20.41% |
|  |  |  |  |
| Speech Mapping |  |  |  |
| Yes | 28541.13 | 5.61 | 17.84% |
|  |  |  |  |
| Motor Mapping |  |  |  |
| Yes | 31068.6 | 5.15 | 19.42% |
|  |  |  |  |
| SSEP Mapping |  |  |  |
| Yes | 28234.23 | 5.67 | 17.65% |
|  |  |  |  |
| Anesthesia Type |  |  |  |
| Awake | 31454.46 | 5.09 | 19.66% |
|  |  |  |  |
| Seizure History Preoperatively |  |  |  |
| Yes | 31143.77 | 5.14 | 19.46% |
|  |  |  |  |
| Seizures Intraoperatively |  |  |  |
| Yes | 30859.72 | 5.18 | 19.29% |
|  |  |  |  |
| Extent of Resection |  |  |  |
| Gross Total Resection (GTR) | 33223.53 | 4.82 | 20.76% |
|  |  |  |  |
| AED Preoperative Regimen |  |  |  |
| One AED | 26590.16 | 6.02 | 16.62% |
| More than One AED | 24613.05 | 6.5 | 15.38% |

**Table S10. Results of Bayesian logistic regression analysis for patients with late seizures.**

| **Delayed Seizures (6 months)** | **St. Dev** | **MCSE** | **HPD (95% Credible Interval)** |
| --- | --- | --- | --- |
| Age |  |  |  |
| 45-54 | 1.79252 | 0.020533 | -4.263142-2.770778 |
| 55-64 | 1.751782 | 0.19744 | -02480403-6.639085 |
| 65-74 | 1.601522 | 0.01787 | -1.060231-5.230051 |
| 75 and Older | 2.498342 | 0.028974 | -1.32053-8.6-248 |
|  |  |  |  |
| Income |  |  |  |
| Below US Median Household Income | 1.1147591 | 0.013018 | -1.647683-2.860381 |
|  |  |  |  |
| Glioma Type |  |  |  |
| High Grade Glioma | 2.079258 | 0.22905 | -3.138789-5.047273 |
|  |  |  |  |
| Speech Mapping |  |  |  |
| Yes | 2.163839 | 0.24105 | -7.124243-1.344466 |
|  |  |  |  |
| Motor Mapping |  |  |  |
| Yes | 1.8339 | 0.21979 | -8.604019-1.44906 |
|  |  |  |  |
| SSEP Mapping |  |  |  |
| Yes | 1.800122 | 0.20815 | -1.355116-5.657909 |
|  |  |  |  |
| Anesthesia Type |  |  |  |
| Awake | 1.671988 | 0.19255 | -3.516581-3.078177 |
|  |  |  |  |
| Seizure History Preoperatively |  |  |  |
| Yes | 1.937186 | 0.22194 | -0.9875708-6.531913 |
|  |  |  |  |
| Seizures Intraoperatively |  |  |  |
| Yes | 2.059383 | 0.24137 | -2.925691-5.15969 |
|  |  |  |  |
| Extent of Resection |  |  |  |
| Gross Total Resection (GTR) | 1.291571 | 0.01374 | -2.274461-2.81816 |
|  |  |  |  |
| AED Preoperative Regimen |  |  |  |
| One AED | 2.038395 | 0.0222111 | -4.524867-3.569445 |
| More than One AED | 2.892066 | 0.033393 | -0.1465083-11.25279 |
|  |  |  |  |
| AED Discharge Adjustment |  |  |  |
| Monotherapy with dose increase | 1.501676 | 0.017353 | -1.635974-4.261358 |
| Complex adjustment (>= 2 AEDs) | 1.439293 | 0.015484 | -3.312068-2.38396 |

**Table S11. Results of Gelman-Rubin (Rc-hat value) convergence diagnostics for each parameter assessed in the Bayesian logistic regression model for patients with late seizures.**

All parameters achieve Rc-hat <1.01.

| **Delayed Seizures (6 months)** | **Rc** |
| --- | --- |
| Age |  |
| 45-54 | 1.000537 |
| 55-64 | 1.000487 |
| 65-74 | 1.000152 |
| 75 and Older | 1.000292 |
|  |  |
| Income |  |
| Below US Median Household Income | 1.000527 |
|  |  |
| Glioma Type |  |
| High Grade Glioma | 1.000184 |
|  |  |
| Speech Mapping |  |
| Yes | 1.000529 |
|  |  |
| Motor Mapping |  |
| Yes | 1.000396 |
|  |  |
| SSEP Mapping |  |
| Yes | 1.00019 |
|  |  |
| Anesthesia Type |  |
| Awake | 1.000075 |
|  |  |
| Seizure History Preoperatively |  |
| Yes | 1.000635 |
|  |  |
| Seizures Intraoperatively |  |
| Yes | 1.000307 |
|  |  |
| Extent of Resection |  |
| Gross Total Resection (GTR) | 1.000658 |
|  |  |
| AED Preoperative Regimen |  |
| One AED | 1.000407 |
| More than One AED | 1.000454 |
|  |  |
| AED Discharge Adjustment |  |
| Monotherapy with dose increase | 1.000395 |
| Complex adjustment (>= 2 AEDs) | 1.000619 |

**Table S12. Effective sample sizes and efficiency values for each parameter in the Bayesian logistic regression model for patients with late seizures.**

| **Delayed Seizures (6 months)** | **ESS** | **Corr. Time** | **Efficiency (%)** |
| --- | --- | --- | --- |
| Age |  |  |  |
| 45-54 | 7621.00 | 20.99 | 4.76% |
| 55-64 | 7871.86 | 20.33 | 4.92% |
| 65-74 | 8032.08 | 19.92 | 5.02% |
| 75 and Older | 7435.33 | 21.52 | 4.65% |
|  |  |  |  |
| Income |  |  |  |
| Below US Median Household Income | 7771.44 | 20.59 | 4.86% |
|  |  |  |  |
| Glioma Type |  |  |  |
| High Grade Glioma | 8240.56 | 19.42 | 5.15% |
|  |  |  |  |
| Speech Mapping |  |  |  |
| Yes | 8058.06 | 19.86 | 5.04% |
|  |  |  |  |
| Motor Mapping |  |  |  |
| Yes | 6961.82 | 22.98 | 4.35% |
|  |  |  |  |
| SSEP Mapping |  |  |  |
| Yes | 7478.82 | 21.39 | 4.67% |
|  |  |  |  |
| Anesthesia Type |  |  |  |
| Awake | 7539.77 | 21.22 | 4.71% |
|  |  |  |  |
| Seizure History Preoperatively |  |  |  |
| Yes | 7618.28 | 21 | 4.76% |
|  |  |  |  |
| Seizures Intraoperatively |  |  |  |
| Yes | 7279.49 | 21.98 | 4.55% |
|  |  |  |  |
| Extent of Resection |  |  |  |
| Gross Total Resection (GTR) | 8836.47 | 18.11 | 5.52% |
|  |  |  |  |
| AED Preoperative Regimen |  |  |  |
| One AED | 8422.14 | 19 | 5.26% |
| More than One AED | 7500.7 | 21.33 | 4.69% |
|  |  |  |  |
| AED Discharge Adjustment |  |  |  |
| Monotherapy with dose increase | 7488.94 | 21.36 | 4.68% |
| Complex adjustment (>= 2 AEDs) | 8640.41 | 18.52 | 5.40% |

**Figure S1. E-value for sensitivity analysis of independent significant result(s) in multivariable logistic regression model for early or late seizures.**

In contrast with most other sensitivity analysis approaches that focus on whether confounding of a specified strength would suffice to explain away an effect estimate, the E-value focuses on the magnitude of the confounder associations that could produce confounding bias equal to the observed association. The observed odds ratio of 28.45 could be explained away by an unmeasured confounder that was associated with both preoperative AEDs and the outcome by a risk ratio of 10.14-fold each, above and beyond the measured confounders, but weaker confounding could not do so. Also, an unmeasured confounder associated with both by an odds ratio of 2.293-fold each could explain away the lower confidence limit.


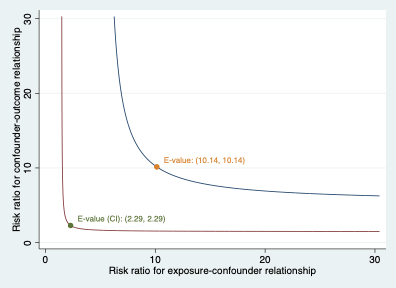


**Figure S2. E-value for sensitivity analysis of independent significant result(s) in multivariable logistic regression model for late seizures.**

The observed odds ratio of 0.088 could be explained away by an unmeasured confounder that was associated with both motor mapping and the outcome by a risk ratio of 6.19-fold each, above and beyond the measured confounders, but weaker confounding could not do so. Also, an unmeasured confounder associated with both by an odds ratio of 1.23-fold each could explain away the lower confidence limit.
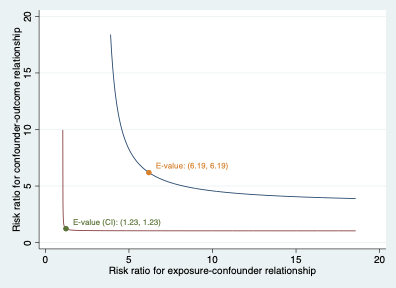


**Figure S3. MCMC Random-walk Metropolis Hastings sampling model diagnostics.**

Each variable in the model was assessed visually for convergence as above. Top left trace plot, top right overlay of posterior parameter histograms for all chains, bottom left shows autocorrelation plots, and bottom right shows overlay of density plots for all chains. All suggesting that the model achieved convergence and fit for valid interpretation. We used random-number seed 16 for reproducibility in our analysis.


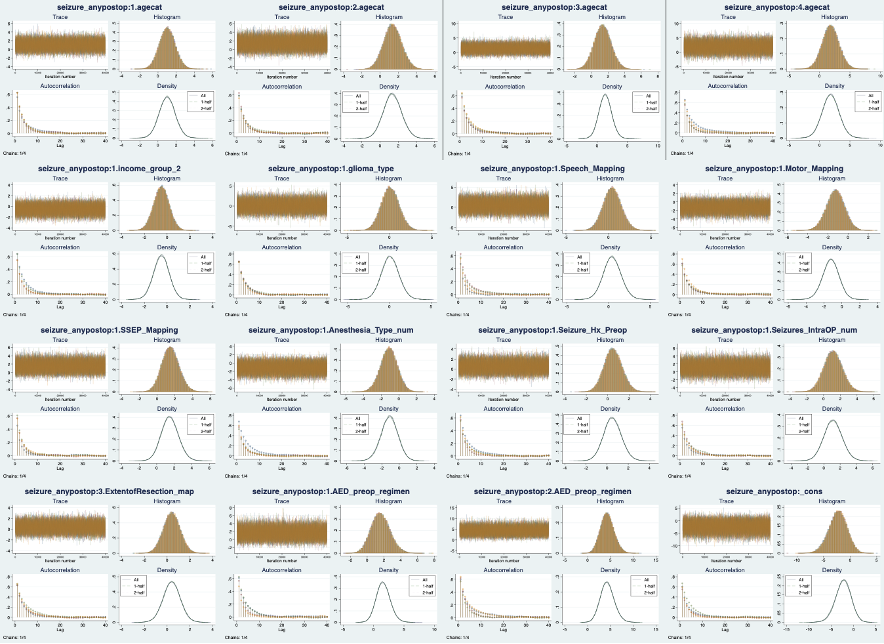


**Figure S4. Results from sensitivity analysis of Bayesian logistic regression model showing the effect of different hypothetical priors and variances on the estimated posterior odds ratio of intraoperative seizures.**


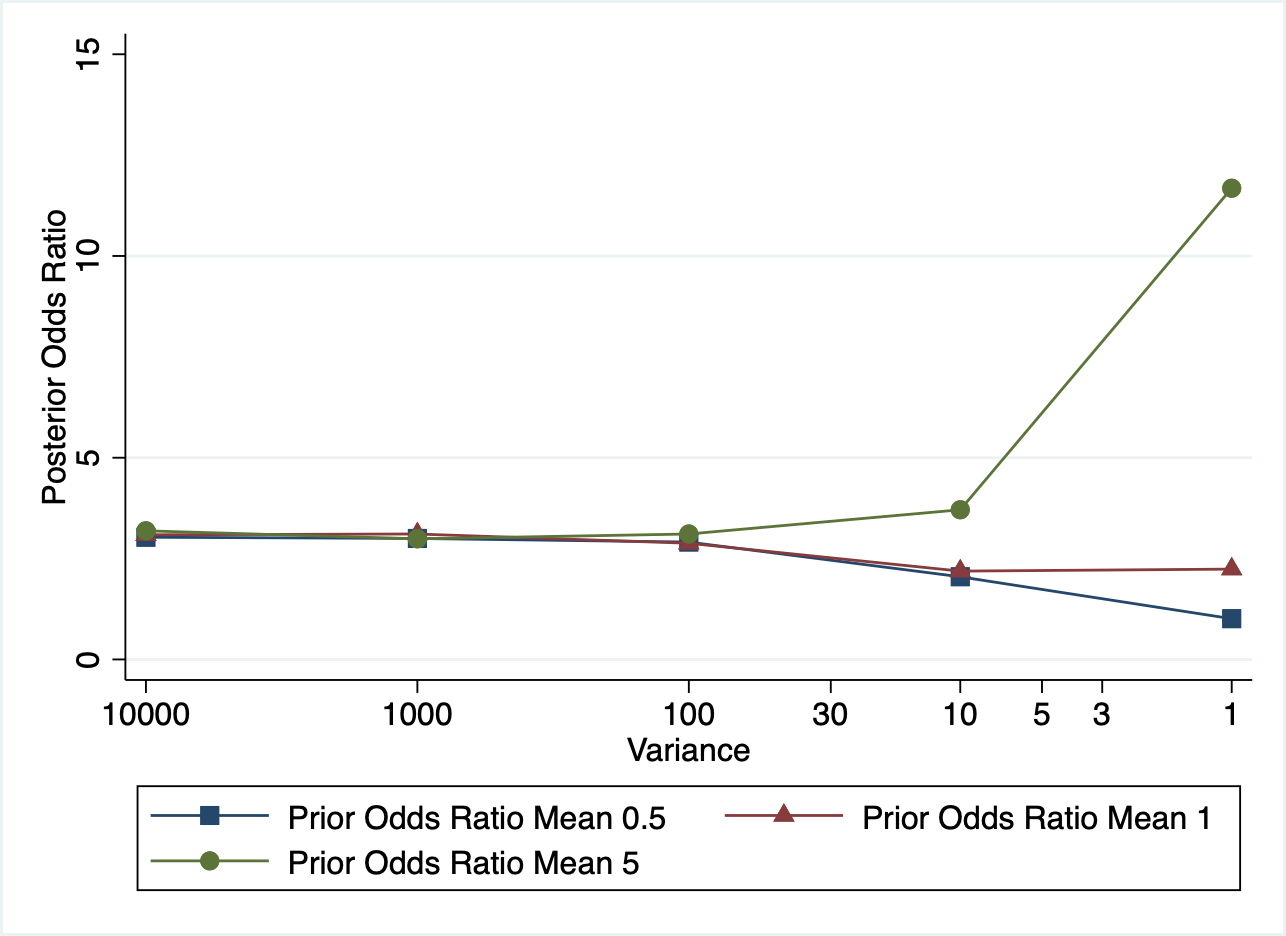


**Figure S5. MCMC Random-walk Metropolis Hastings sampling model diagnostics.**

Top left trace plot, top right overlay of posterior parameter histograms for all chains, bottom left shows autocorrelation plots, and bottom right shows overlay of density plots for all chains. All suggesting that the model achieved convergence and fit for valid interpretation. We used random-number seed 16 for reproducibility in our analysis.


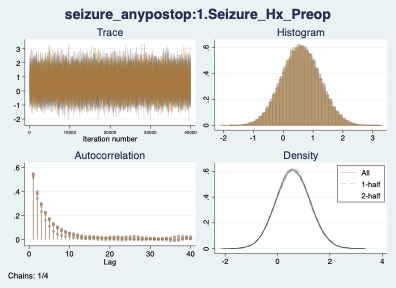


**Figure S6. MCMC Random-walk Metropolis Hastings sampling model diagnostics.**

Top left trace plot, top right overlay of posterior parameter histograms for all chains, bottom left shows autocorrelation plots, and bottom right shows overlay of density plots for all chains. All suggesting that the model achieved convergence and fit for valid interpretation. We used random-number seed 16 for reproducibility in our analysis.


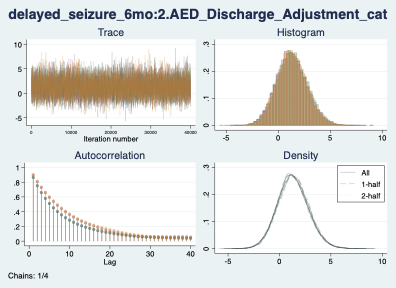


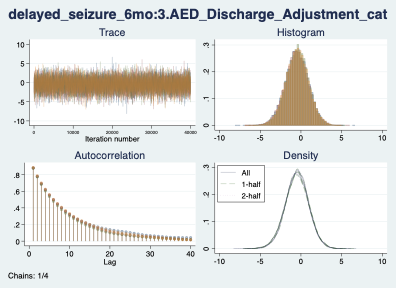

Supplement: Supplementary file 1 [file 5133ecee63a128cc3495cbd9.docx]
